# Supplementary material
Source: PubMed Central journal article supplement (PMC5750850)

## **Supplementary information**

### **Figures**

**Suppl. Figure S1:** iTRAQ sample preparation and analysis. Flow chart describes the workflow for the iTRAQ approach.

**Suppl. Figure S2:** Peptide distribution per protein for a subset of hits. Predicted protein orientation and peptide mapping for these hits is shown.

**Suppl. Figure S3:** Complete Western blot data. Entire Western blot membranes for the data in 6A are shown.

**Suppl. Figure S4.** 3D surface plot of Pf3D7\_1310500 (green) and PfSBP1 (red) in untreated pRBCs (**A**), or pRBCs treated with trypsin (**B**), showing the pRBC surface (Spectrum LUT), and the specific protein localization (original colors). Scale for the x/y axis was 0.86, while scale for the z-axis was 0.97.

### **Tables**

**Suppl. Table S1:** Peptide report from pRBC membrane proteomics against the Pf3D7 and Pf2004 database.

**Suppl. Table S2:** Protein report from pRBC membrane proteomics against the Pf3D7 and Pf2004 database.

**Suppl. Table S3:** Significant hits from pRBC membrane proteomics.

**Suppl. Tables S4,S5:** Peptide report from supernatant proteomics against the Pf3D7 and Pf2004 databases, respectively.

**Suppl. Tables S6,S7:** Protein report from supernatant proteomics against the Pf3D7 and Pf2004 databases, respectively.

**Suppl. Table S8:** Quantitative protein data from PEXEL search.

**Suppl. Tables S9, S10:** All significant hits from quantitative protein data against Pf3D7 and Pf2004 databases.

**Suppl. Table S11:** Significant hits from quantitative proteomics enriched in pRBC supernatant.

# Figure S1

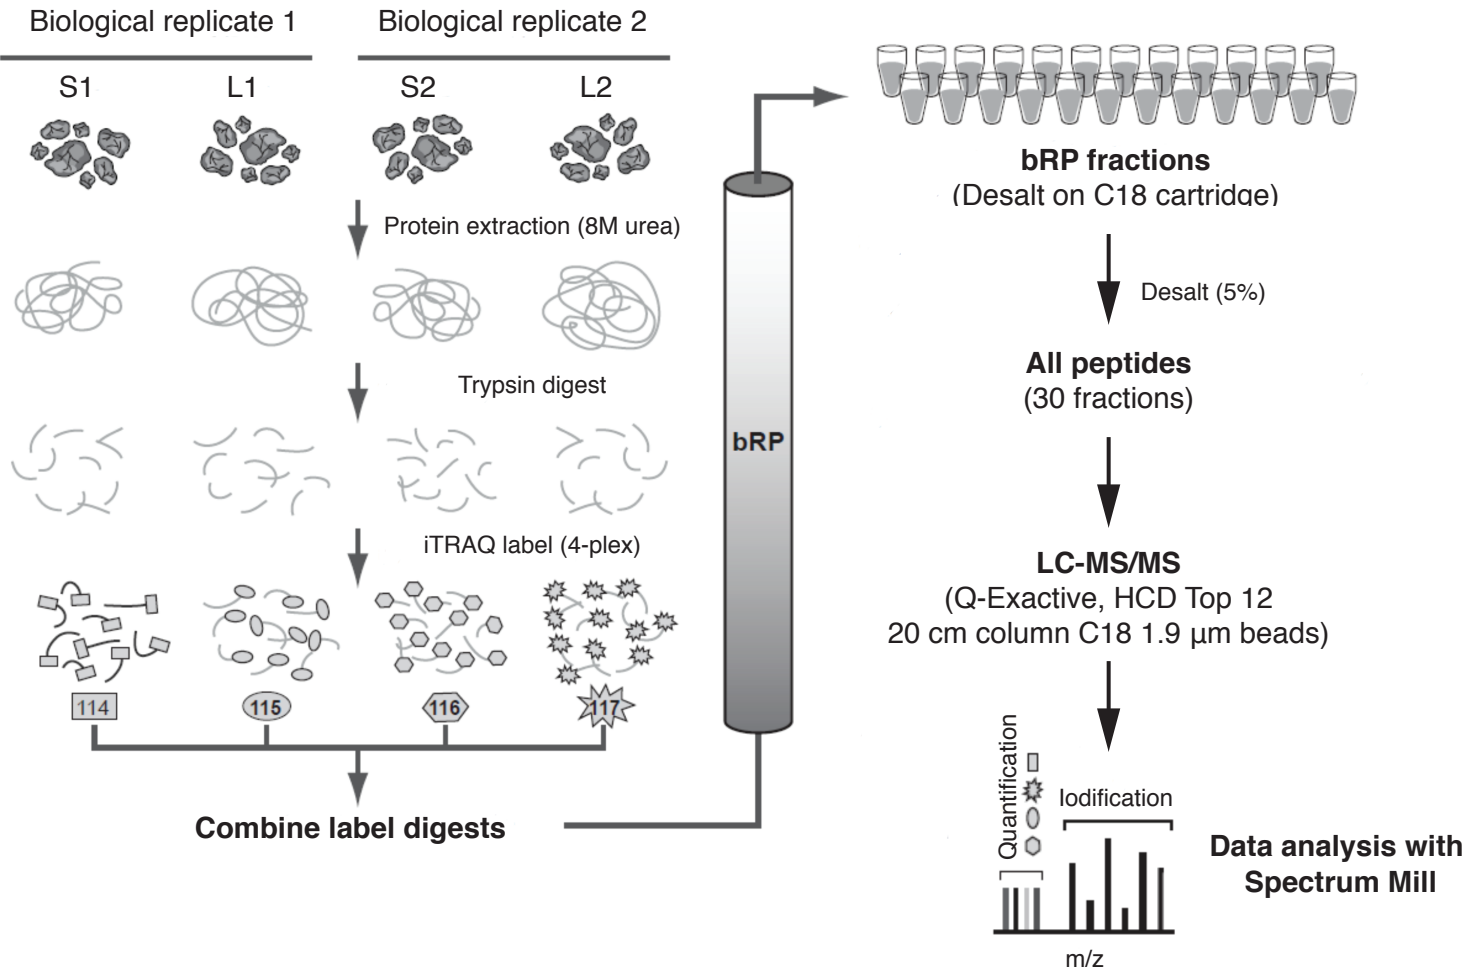

# Figure S2

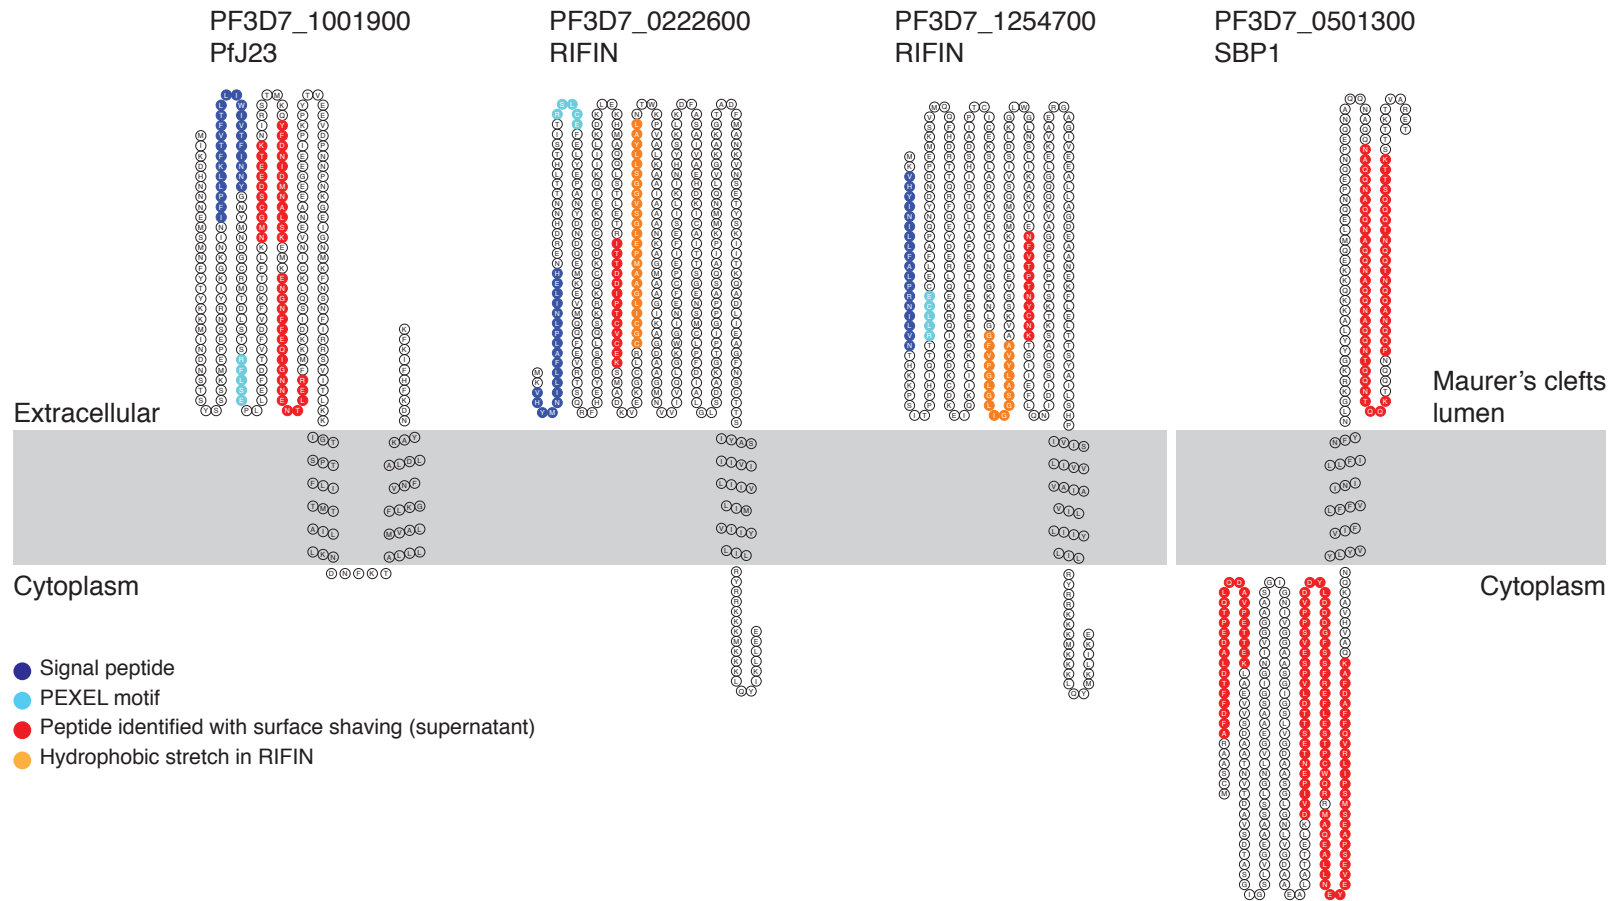

# Figure S3

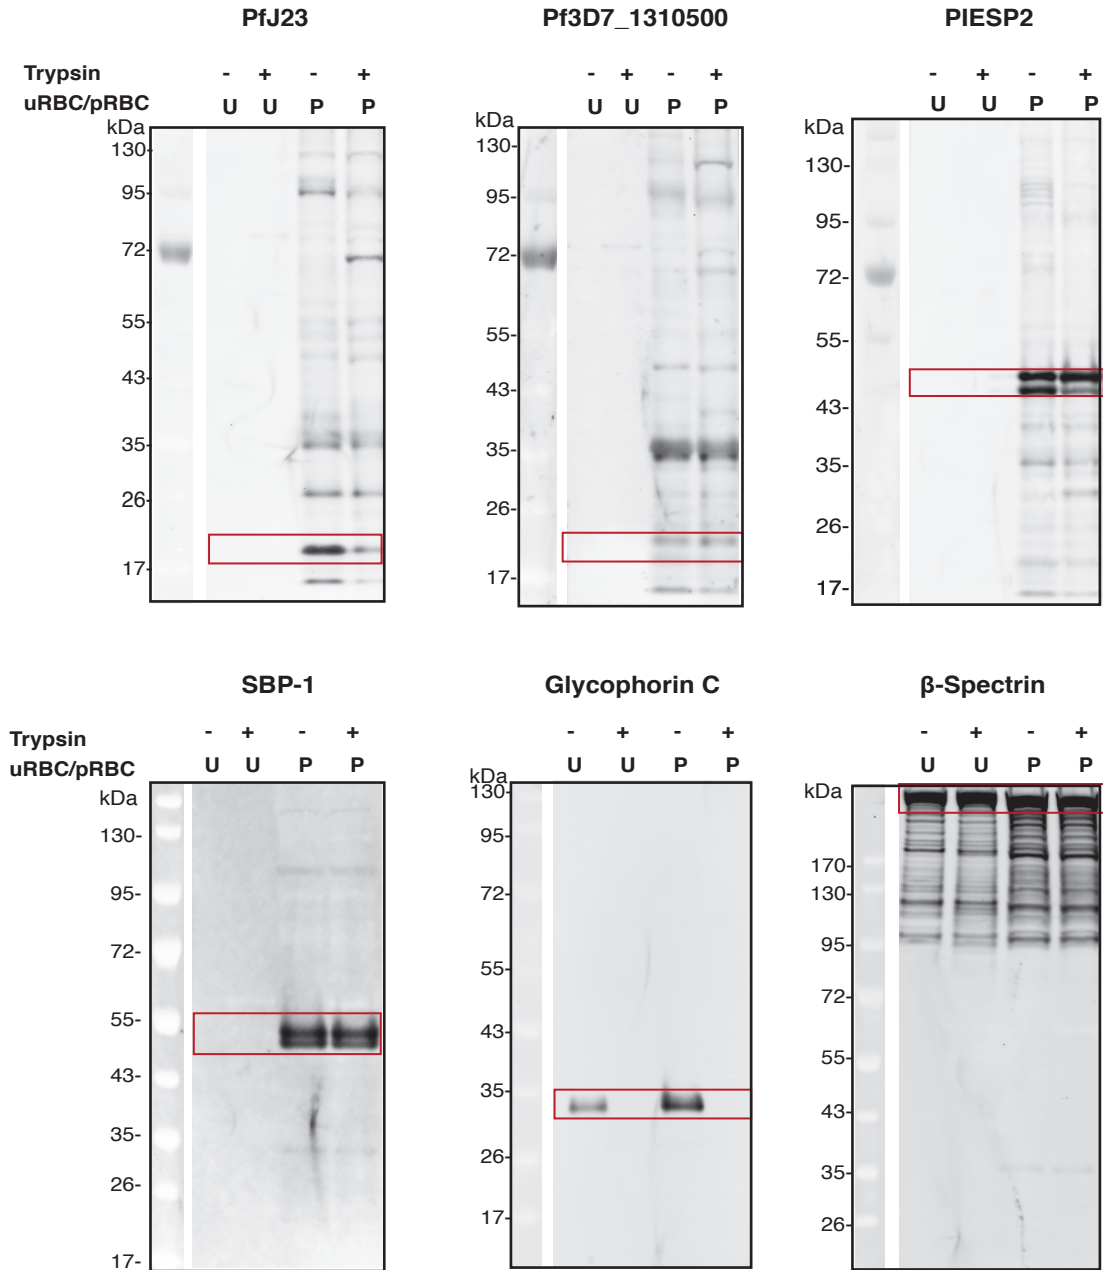

# Figure S4

**A**

Pf3D7\_1310500

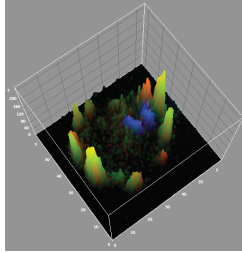

SBP1/A488

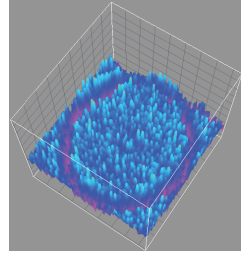

iRBCs

**B**

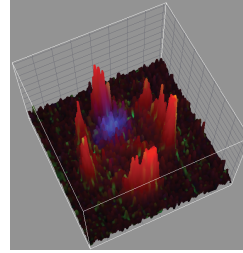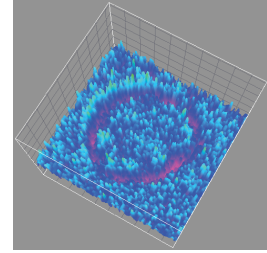

Supplement: supp_RA117.000076_4635_1_supp_6664_2wl2lz.pdf [file supp_RA117.000076_4635_1_supp_6664_2wl2lz.pdf]
